# Supplementary material
Source: PubMed Central journal article supplement (PMC2268147)
Supplement: supp_0711506105_11506Fig6.pdf [file supp_0711506105_11506Fig6.pdf]

|                      |                                                        |
|----------------------|--------------------------------------------------------|
| MedicDicerIIIB       | HGSSALEKQIKDFVKEVQDELSKPGFNSFGLGD-----CKAPKV           |
| RiceDicerIIIB        | HSSGLLLDQITEYVNRLEGSS-MDKVELLSDGL-----PKGPKV           |
| ArabidopsisDicerIIIB | CESIYLHEVIEDYTNFLASSP----LASGQSEG-----PRCPKV           |
| FruitFlyDicerIIIB    | HLS PGLNDVIDRFVRIQQENGHCISEEYLLSEEECDDAED-----VEVPKA   |
| MosquitoDicerIIIB    | HLS PGLNDVIDRFVRIQQDNGHIISEEYLLISEDECDEAED-----VEVPKA  |
| HoneyBeeDicerIIIB    | HLS PGLSIVINRFVRIQEENGHSISEEYLLIGEEECDEAED-----VEVPKA  |
| BeetleDicerIIIB      | NLSPSLNEVVEKFRRLQEDSGHTLVDELYLVVET--EEVED-----VEVPKA   |
| humanDicerIIIB       | AVSPELFHVVIDDFVQFQLEKNEMQGMDSELRRSEEDDEEKEE----DIEVPKA |
| MonkeyDicerIIIB      | AVSPELFHVVIDDFVQFQLEKNEMQGMDSELRRSEEDDEEKEE----DIEVPKA |
| CattleDicerIIIB      | AVSPELFHVVIDDFVQFQLEKNEMQGMDSELRRSEEDDEEKEE----DIEVPKA |
| DogDicerIIIB         | AVSPELFHVVIDDFVQFQLEKNEMQGMDSELRRSEEDDEEKEE----DIEVPKA |
| ChickenDicerIIIB     | AVSPELFHVVIDDFVQFQMEKNEMQGMDSELRRSEEDDEEKEE----DIEVPKA |
| OpossumDicerIIIB     | AVSPELFHVVIDDFVQFQLEKNEMQGMDSELRRSEEDDEEKEE----DIEVPKA |
| HamsterDicerIIIB     | AVSPELFHVVIDDFVQFQLEKNEMQGMDSELRRSEEDDEEKEE----DIEVPKA |
| RatDicerIIIB         | AVSPELFHVVIDDFVQFQLEKNEMQGMDSELRRSEEDDEEKEE----DIEVPKA |
| ZebrafishDicerIIIB   | AVSPELFHVVIDDFVQFQLEKNEMQGMDSELRRSEEDDEEKEE----DIEVPKA |
| mouseDicerIIIB       | AVSPELFHVVIDDFVKFQLEKNEMQGMDSELRRSEEDDEEKEE----DIEVPKA |
| SeaUrchinDicerIIIB   | AYTANMFQVIDNFVTFVDAKNEALGMDSQLKYSEM DGEQES--EDIEVPKA   |
| C.eleganDicerIIIB    | AMCPGLYHMIKFKV KLCSENFDTNFNAEMYMVTTEEEIDEGQEEDIEVPKA   |
| GiardiaDicerIIIB     | SVVSEVILIESHPKIQPS-----KV                              |

Helix  $\alpha 6^*$

Lys1790
