# Supplementary material
Source: PubMed Central journal article supplement (PMC2268147)
Supplement: supp_0711506105_11506Table1.pdf [file supp_0711506105_11506Table1.pdf]

**Table 1. Data collection and refinement statistics**

|                                            | <b>Apo-Dicer</b>                   | <b>Dicer + Cd<sup>2+</sup></b>     |
|--------------------------------------------|------------------------------------|------------------------------------|
| <b>Crystal data</b>                        |                                    |                                    |
| Space Group                                | P4 <sub>2</sub> 2 <sub>1</sub> 2   | P4 <sub>2</sub> 2 <sub>1</sub> 2   |
| Unit Cell (Å)                              | a = 66.50, b = 66.50<br>c = 134.08 | a = 70.10, b = 70.10<br>c = 132.59 |
| <i>z</i> <sup>a</sup>                      | 1                                  | 1                                  |
| <b>X-Ray data collection statistics</b>    |                                    |                                    |
| Wavelength (Å)                             | 0.9795                             | 1.11                               |
| Resolution (Å)                             | 40 – 1.68                          | 40.0 – 2.80                        |
| Total reflections                          | 565,070                            | 58,363                             |
| Unique reflections                         | 31,447                             | 7,513                              |
| Completeness (last shell) (%) <sup>b</sup> | 94.2 (56.55)                       | 90.78 (51.70)                      |
| <i>R</i> <sub>merge</sub> (last shell)     | 6.0 (44.4)                         | 5.7 (36.8)                         |
| <i>I</i> / $\sigma$ (last shell)           | 63.4 (2.3)                         | 28.6 (3.67)                        |
| <b>Phasing statistics</b>                  |                                    |                                    |
| Method                                     | SAD                                | MR                                 |
| Figure of Merit                            | 0.51                               |                                    |
| <b>Refinement statistics</b>               |                                    |                                    |
| <i>R</i> <sub>cryst</sub> , % <sup>c</sup> | 18.0                               | 23.27                              |
| <i>R</i> <sub>free</sub> , % <sup>c</sup>  | 21.0                               | 30.42                              |
| Mean <i>B</i> -factors, Å <sup>2</sup>     | 25.11                              | 99.9                               |
| rmsd bonds, Å                              | 0.014                              | 0.019                              |
| rmsd angles, °                             | 1.41                               | 2.16                               |
| Ramachandran plot outliers, %              | 0.0                                | 4.62                               |

<sup>a</sup> *z* is the number of equivalent structures per asymmetric unit

<sup>b</sup>  $R_{\text{merge}} = \sum |I_{\text{hkl}} - \langle I_{\text{hkl}} \rangle| / \sum I_{\text{hkl}}$ , where  $I_{\text{hkl}}$  is the measured intensity of hkl reflection and  $\langle I_{\text{hkl}} \rangle$  is the mean of all measured intensity of hkl reflection

<sup>c</sup>  $R_{\text{cryst}} = \sum_{\text{hkl}} | |F_{\text{obs}}| - |F_{\text{calc}}| | / \sum_{\text{hkl}} |F_{\text{obs}}|$ , where  $F_{\text{obs}}$  is the observed structure factor amplitude and  $F_{\text{calc}}$  is the structure factor calculated from model.  $R_{\text{free}}$  is computed in the same manner as is  $R_{\text{cryst}}$ , with the test set of reflections (5%).
