# Supplementary material
Source: PubMed Central journal article supplement (PMC2268147)

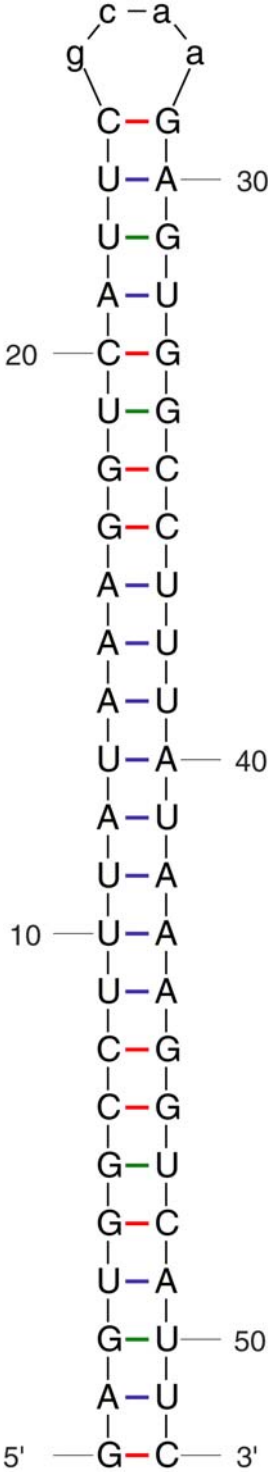

Supplement: supp_0711506105_11506Fig9.pdf [file supp_0711506105_11506Fig9.pdf]
